# Supplementary material for: Streamlined concept towards spatially resolved photoactivation of dynamic transesterification in vitrimeric polymers by applying thermally stable photolatent bases
Source: Royal Society of Chemistry journal article supplement (doi:10.1039/d1py01722e), 2022-01-01
Supplement: d1py01722e1.pdf [file d1py01722e1.pdf]

## Supporting Information

### **Streamlined concept towards spatially resolved photoactivation of dynamic transesterification in vitrimeric polymers by applying thermally stable photolabile bases**

David Reisinger,<sup>a</sup> Kurt Dietliker,<sup>b</sup> Marco Sangermano<sup>c</sup> and Sandra Schlögl<sup>\*a</sup>

<sup>a</sup> Polymer Competence Center Leoben GmbH, Roseggerstrasse 12, 8700 Leoben, Austria.

<sup>b</sup> SCD Dr. Sommerlade Chemistry Design GmbH, Rheinfeldener Straße 27, 79395 Neuenburg am Rhein, Germany.

<sup>c</sup> Politecnico di Torino, Department of Applied Science and Technology, Corso Duca degli Abruzzi 24, 10124 Torino, Italy.

E-mail: [sandra.schloegl@pccl.at](mailto:sandra.schloegl@pccl.at)

## Supplementary Tables

**Table S1** Spectral intensity distribution of the irradiation source used. All listed values for the UVC, UVB, UVA and UVV wavelength region are average values calculated from ten individual measurements.

| UVC <sup>[a]</sup><br>[mW/cm <sup>2</sup> ] | UVB <sup>[b]</sup><br>[mW/cm <sup>2</sup> ] | UVA <sup>[c]</sup><br>[mW/cm <sup>2</sup> ] | UVV <sup>[d]</sup><br>[mW/cm <sup>2</sup> ] | Total intensity <sup>[e]</sup><br>[mW/cm <sup>2</sup> ] |
|---------------------------------------------|---------------------------------------------|---------------------------------------------|---------------------------------------------|---------------------------------------------------------|
| 7                                           | 13                                          | 305                                         | 382                                         | 707                                                     |

[a] 250-260 nm, [b] 280-320 nm, [c] 320-390 nm, [d] 395-445 nm, [e] 250-445 nm.

## Supplementary Schemes

### Initiation reaction I <sup>[a]</sup>

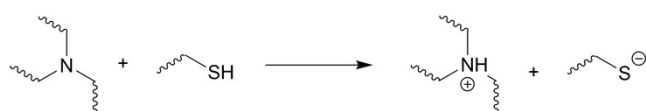

### Initiation reaction II <sup>[b]</sup>

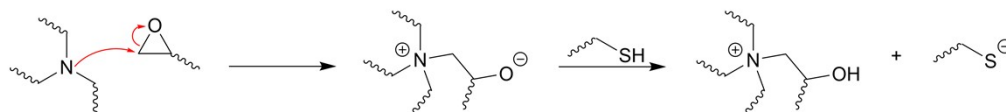

### Propagation reaction <sup>[c]</sup>

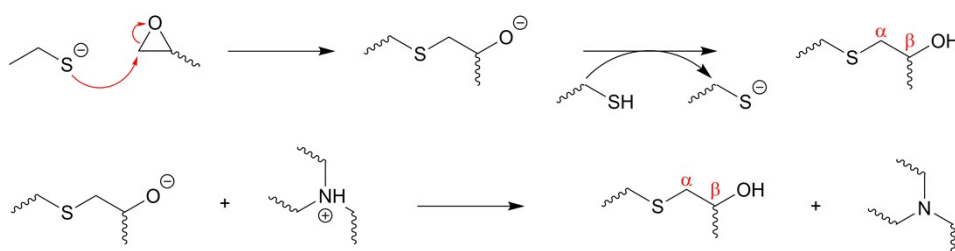

### Termination/Regeneration reaction <sup>[d]</sup>

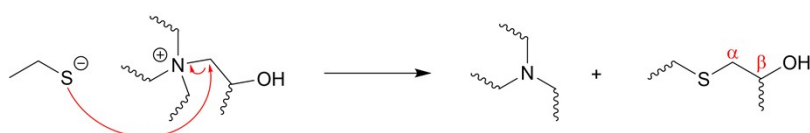

**Scheme S1** Mechanism proposed in the literature for curing of thiol-epoxy resins by nucleophilic tertiary amines<sup>1</sup>: [a] direct deprotonation of the thiol group, [b] nucleophilic ring opening of an epoxy group by a nucleophilic tertiary amine catalysed by hydroxy groups, [c] nucleophilic ring opening of an epoxy group by a thiolate group, followed by a protonation of the generated alkoxide by a thiol group or the protonated tertiary amine, resulting in the formation of a β-hydroxythioether link, [d] nucleophilic displacement of the initiator i.e. regeneration of the tertiary amine.

## Supplementary Figures

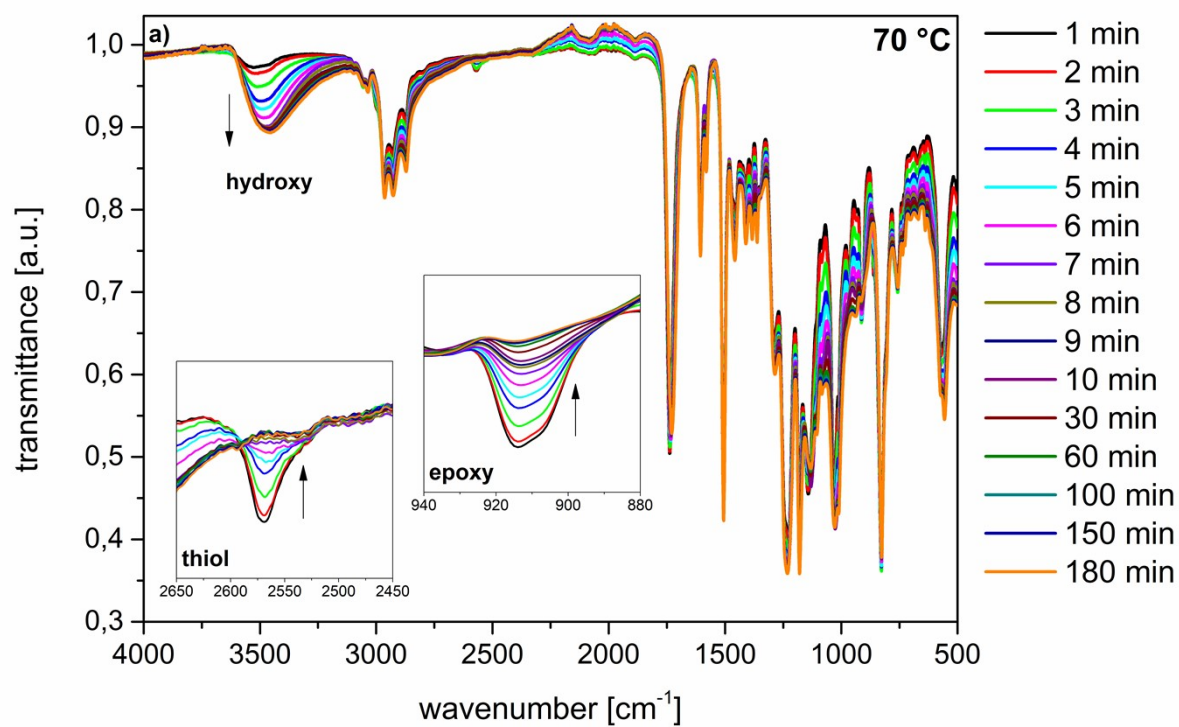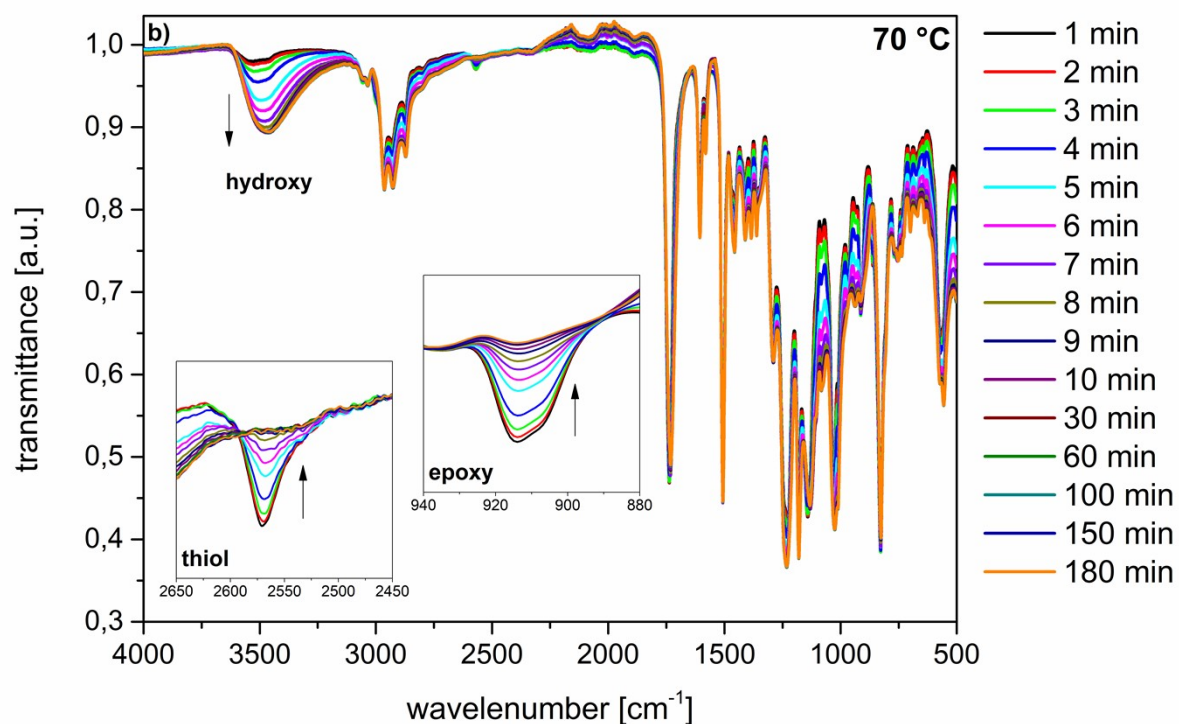

**Fig. S1** Curing behaviour of unirradiated a) TE-PLB-1193-ITX and b) TE-PLB-090 formulations examined by FTIR-ATR measurements conducted at a constant temperature of 70 °C.

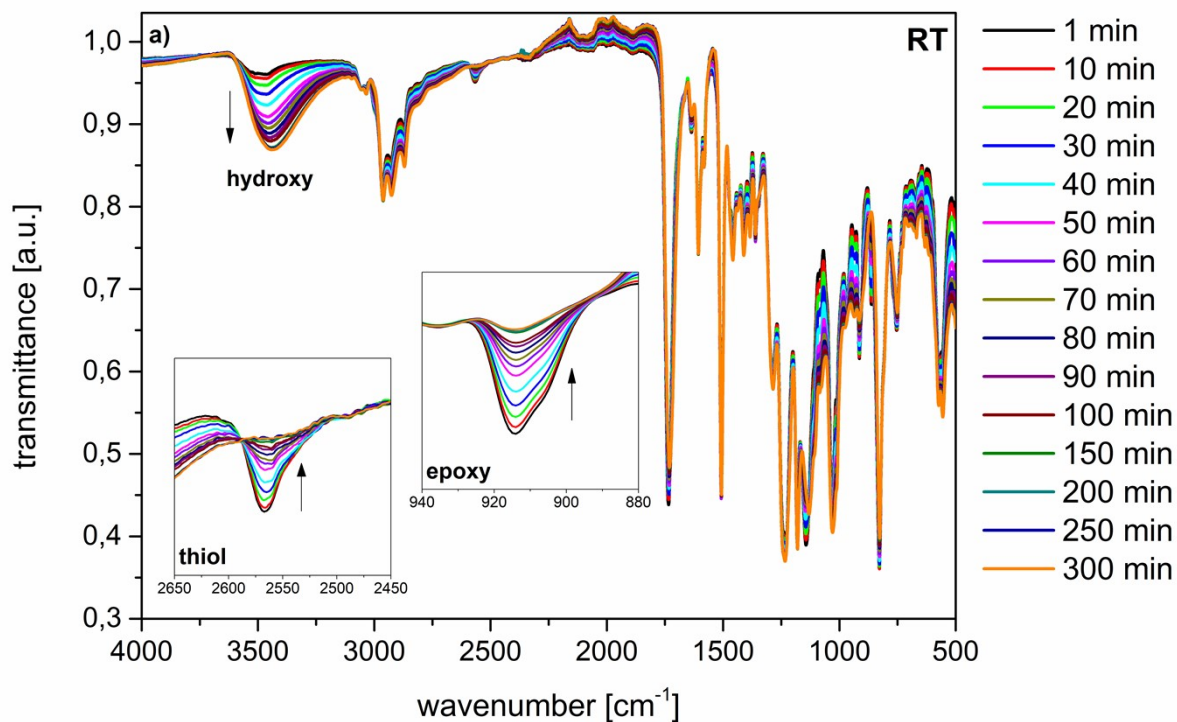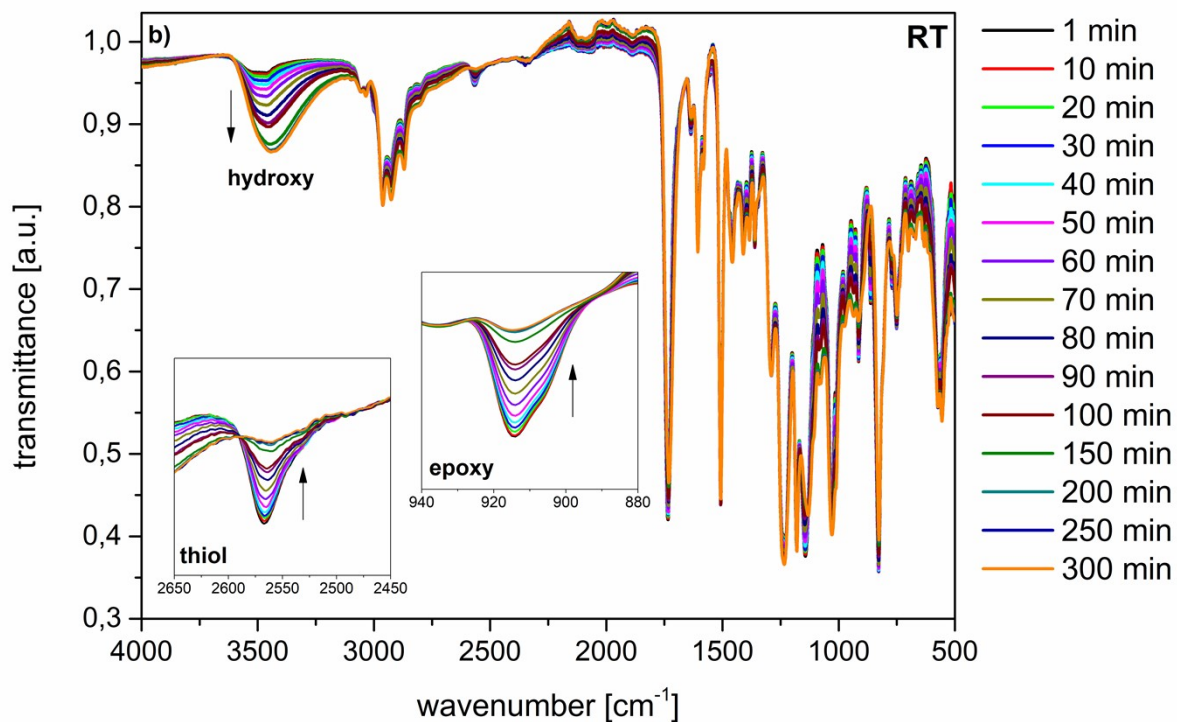

**Fig. S2** Curing behaviour of unirradiated a) TE-PLB-1193-ITX and b) TE-PLB-090 formulations examined by FTIR-ATR measurements conducted at room temperature.

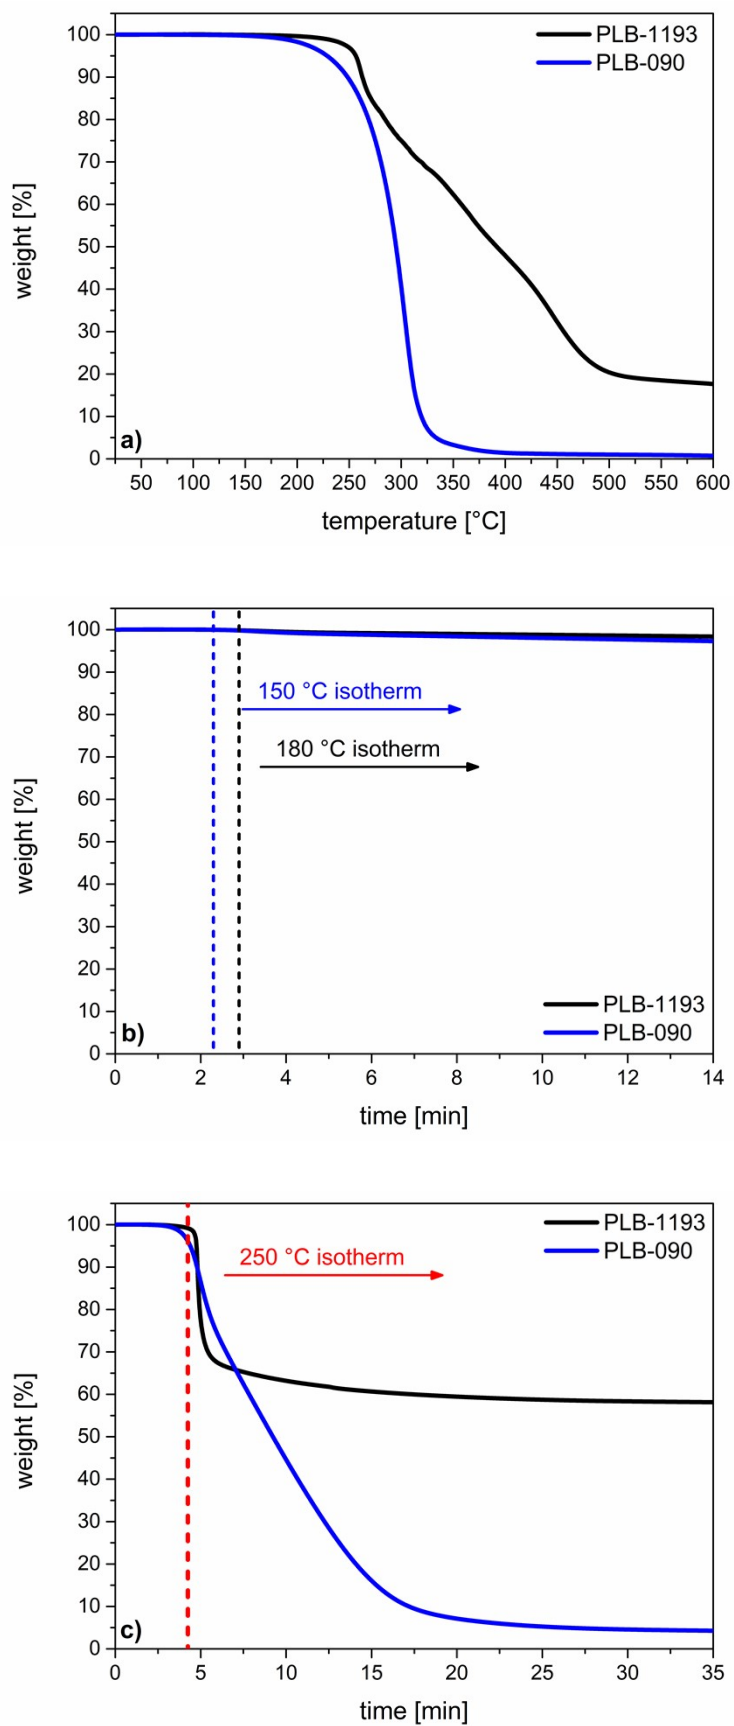

**Fig. S3a** TGA curves of PLB-1193 and PLB-090 recorded under nitrogen atmosphere. a) Dynamic measurement using a heating rate of 20 °C/min. Isothermal measurements carried out b) below the decomposition temperatures of PLB-1193 and PLB-090 at 180 °C and 150 °C, respectively and c) above the decomposition temperature of PLB-1193 and PLB-090 at 250 °C.

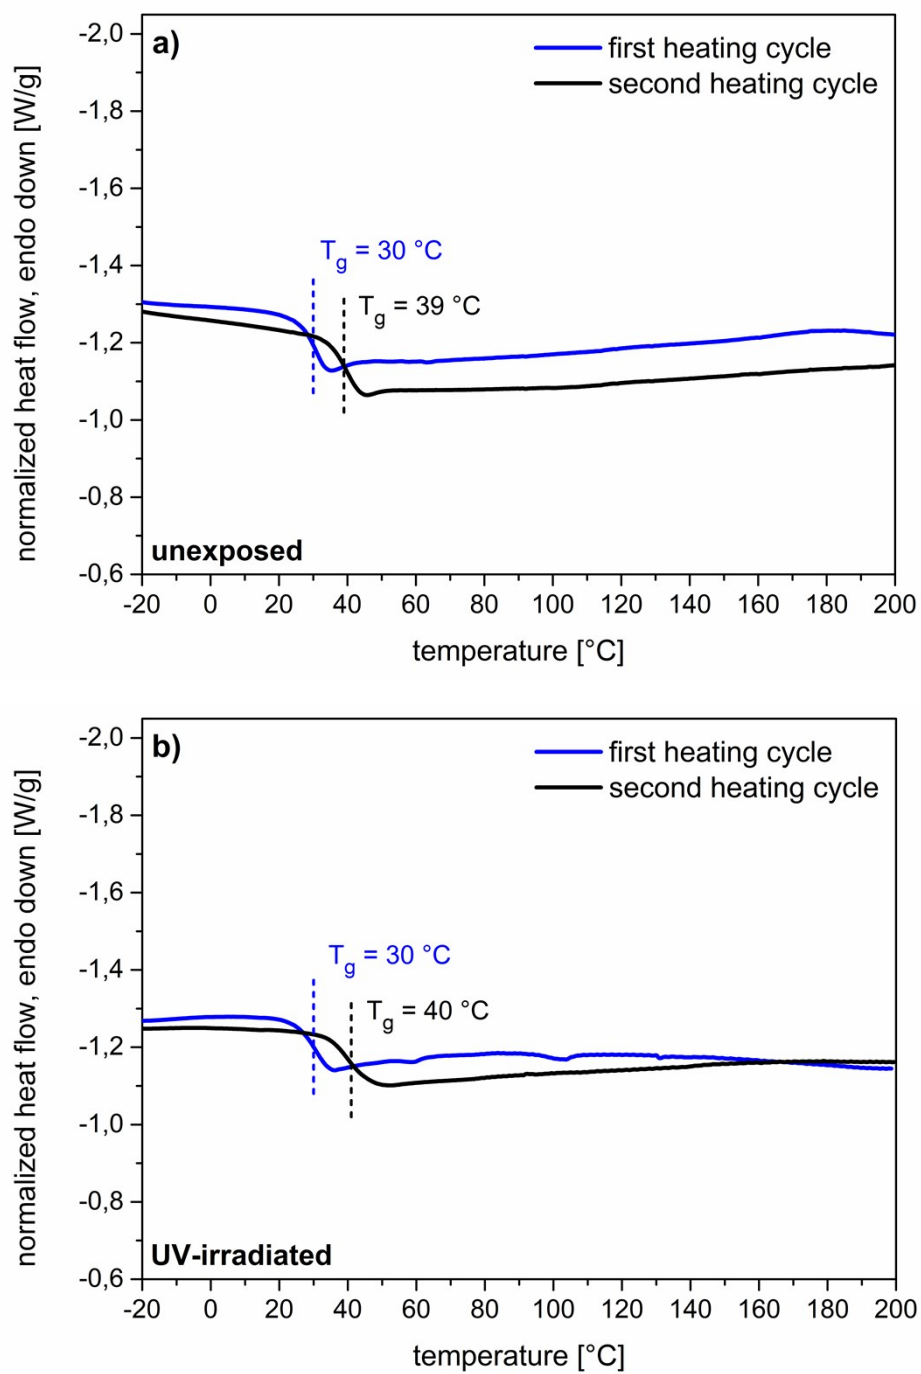

**Fig. S4** DSC data obtained under nitrogen atmosphere in two heating cycles for a) unexposed and b) UV-irradiated (424 J/cm<sup>2</sup> applied at 60 °C) TE-PLB-1193-ITX.

## References

- 1 a) A. O. Konuray, X. Fernández-Francos and X. Ramis, *Polym. Chem.*, 2017, **8**, 5934–5947; b) C. F. Carlborg, A. Vastesson, Y. Liu, W. van der Wijngaart, M. Johansson, T. Haraldsson, *J. Polym. Sci., Part A: Polym. Chem.*, 2014, **52**, 2604-2615.
